# Supplementary material for: Synergistic effect on static and dynamic mechanical properties of carbon fiber-multiwalled carbon nanotube hybrid polycarbonate composites
Source: Royal Society of Chemistry journal article supplement (doi:10.1039/c6ra08487g), 2016-01-01

### Supplementary Information

**Table S1:** Tensile and Flexural parameters

| Composite                    | Tensile Strength | Elastic Modulus | Flexural Strength | Flexural Modulus |
|------------------------------|------------------|-----------------|-------------------|------------------|
|                              |                  |                 |                   |                  |
| Pure PC                      | 66.5±2.0         | 1356±120        | 95.8±3.0          | 2154±53          |
| 2 wt. % MWCNT/PC             | 79.5±3.0         | 1564±97         | 110.2±1.4         | 2410±59          |
| 2 wt. % aMWCNT/PC            | 81.3±2.5         | 1613±77         | 113.1±1.7         | 2494±78          |
| 2 wt. % CF/PC                | 85.0±3.0         | 2074±140        | 115.0±1.2         | 2736±74          |
| 1wt. % CF/1 wt. % MWCNT/PC   | 85.7±1.8         | 2142±113        | 115.6±1.2         | 2809±63          |
| 1wt. % CF/1 wt. % aMWCNT/PC  | 86.4±1.7         | 2220±124        | 116.3±0.9         | 2896±88          |
| 5 wt. % CF/PC                | 86.8±2.5         | 2289±97         | 119.0±1.9         | 3041±68          |
| 10 wt. % CF/PC               | 87.5±1.6         | 2537±84         | 123.0±1.3         | 3740±84          |
| 15 wt. % CF/PC               | 89.5±1.9         | 2964±110        | 128.0±1.7         | 4129±59          |
| 20 wt. % CF/PC               | 91.3±1.1         | 3149±91         | 134.0±2.6         | 4920±83          |
| 18wt. % CF/2 wt. % MWCNT/PC  | 92.6±1.8         | 3219±110        | 135.2±1.5         | 5098±96          |
| 18wt. % CF/2 wt. % aMWCNT/PC | 93.6±1.3         | 3304±89         | 136.1±1.3         | 5233±79          |

**Table S2:** Storage Modulus and Glass transition temperature parameters

| Composite                    | E' at 40°C (MPa) | E' at 180°C (MPa) | Tg from E' (°C) | Tg from tanδ (°C) |
|------------------------------|------------------|-------------------|-----------------|-------------------|
| Pure PC                      | 1050             | 3                 | 145.3           | 160.2             |
| 2 wt. % MWCNT/PC             | 1380             | 10                | 143.8           | 158.4             |
| 2 wt. % aMWCNT/PC            | 1680             | 13                | 141.7           | 158               |
| 2 wt. % CF/PC                | 1750             | 14                | 145             | 160               |
| 1wt. % CF/1 wt. % MWCNT/PC   | 1870             | 18                | 144.7           | 159.6             |
| 1wt. % CF/1 wt. % aMWCNT/PC  | 2080             | 21                | 144.1           | 158.8             |
| 5 wt. % CF/PC                | 2130             | 22                | 141.6           | 159               |
| 10 wt. % CF/PC               | 2450             | 26                | 139.7           | 158.5             |
| 15 wt. % CF/PC               | 2720             | 34                | 138.3           | 158.6             |
| 20 wt. % CF/PC               | 2904             | 39                | 137             | 158.2             |
| 18wt. % CF/2 wt. % MWCNT/PC  | 3040             | 42                | 136.3           | 157.3             |
| 18wt. % CF/2 wt. % aMWCNT/PC | 3185             | 45                | 134.3           | 156.2             |

**Table S3:** C Factor and Degree of Entanglement parameters

| Composites        | C Factor | Degree of Entanglement |           |       |
|-------------------|----------|------------------------|-----------|-------|
|                   |          | 40°C                   | 180°C     | 130°C |
| 2 wt. % MWCNT/PC  | 0.39429  | 88383.96454            | 442.52777 | 1.27  |
| 2 wt. % aMWCNT/PC | 0.36923  | 107597.86987           | 575.28610 | 1.54  |

|                              |         |              |           |      |
|------------------------------|---------|--------------|-----------|------|
| 2 wt. % CF/PC                | 0.35714 | 112081.11445 | 619.53888 | 1.72 |
| 1wt. % CF/1 wt. % MWCNT/PC   | 0.29683 | 119766.67658 | 796.54998 | 1.80 |
| 1wt. % CF/1 wt. % aMWCNT/PC  | 0.28299 | 133216.41031 | 929.30831 | 1.94 |
| 5 wt. % CF/PC                | 0.27662 | 136418.72787 | 973.56109 | 2.00 |
| 10 wt. % CF/PC               | 0.26923 | 156913.56023 | 1150.5722 | 2.20 |
| 15 wt. % CF/PC               | 0.22857 | 174206.07503 | 1504.5944 | 2.78 |
| 20 wt. % CF/PC               | 0.21275 | 185990.60363 | 1725.8583 | 2.98 |
| 18wt. % CF/2 wt. % MWCNT/PC  | 0.20680 | 194700.90738 | 1858.6166 | 3.12 |
| 18wt. % CF/2 wt. % aMWCNT/PC | 0.20222 | 203987.62829 | 1991.3749 | 3.26 |

**Table S4:** Adhesion Factor parameters

| Composites                   | Adhesion Factor |
|------------------------------|-----------------|
| 2 wt. % CF/PC                | 0.0100          |
| 2 wt. % MWCNT/PC             | 0.0051          |
| 2 wt. % aMWCNT/PC            | 0.0124          |
| 20 wt. % CF/PC               | 0.15297         |
| 18wt. % CF/2 wt. % MWCNT/PC  | 0.14734         |
| 18wt. % CF/2 wt. % aMWCNT/PC | 0.13932         |

**Figure S1:** Optical micrographs of Flexural and Tensile specimens: (a) 5 wt. % CF/PC flexural sample (b) 5 wt. % CF/PC tensile sample, (c) 10 wt. % CF/PC flexural sample, (d) 10 wt. % tensile sample, (e) 15 wt. % CF/PC flexural sample and (f) 15 wt. % CF/PC tensile sample.

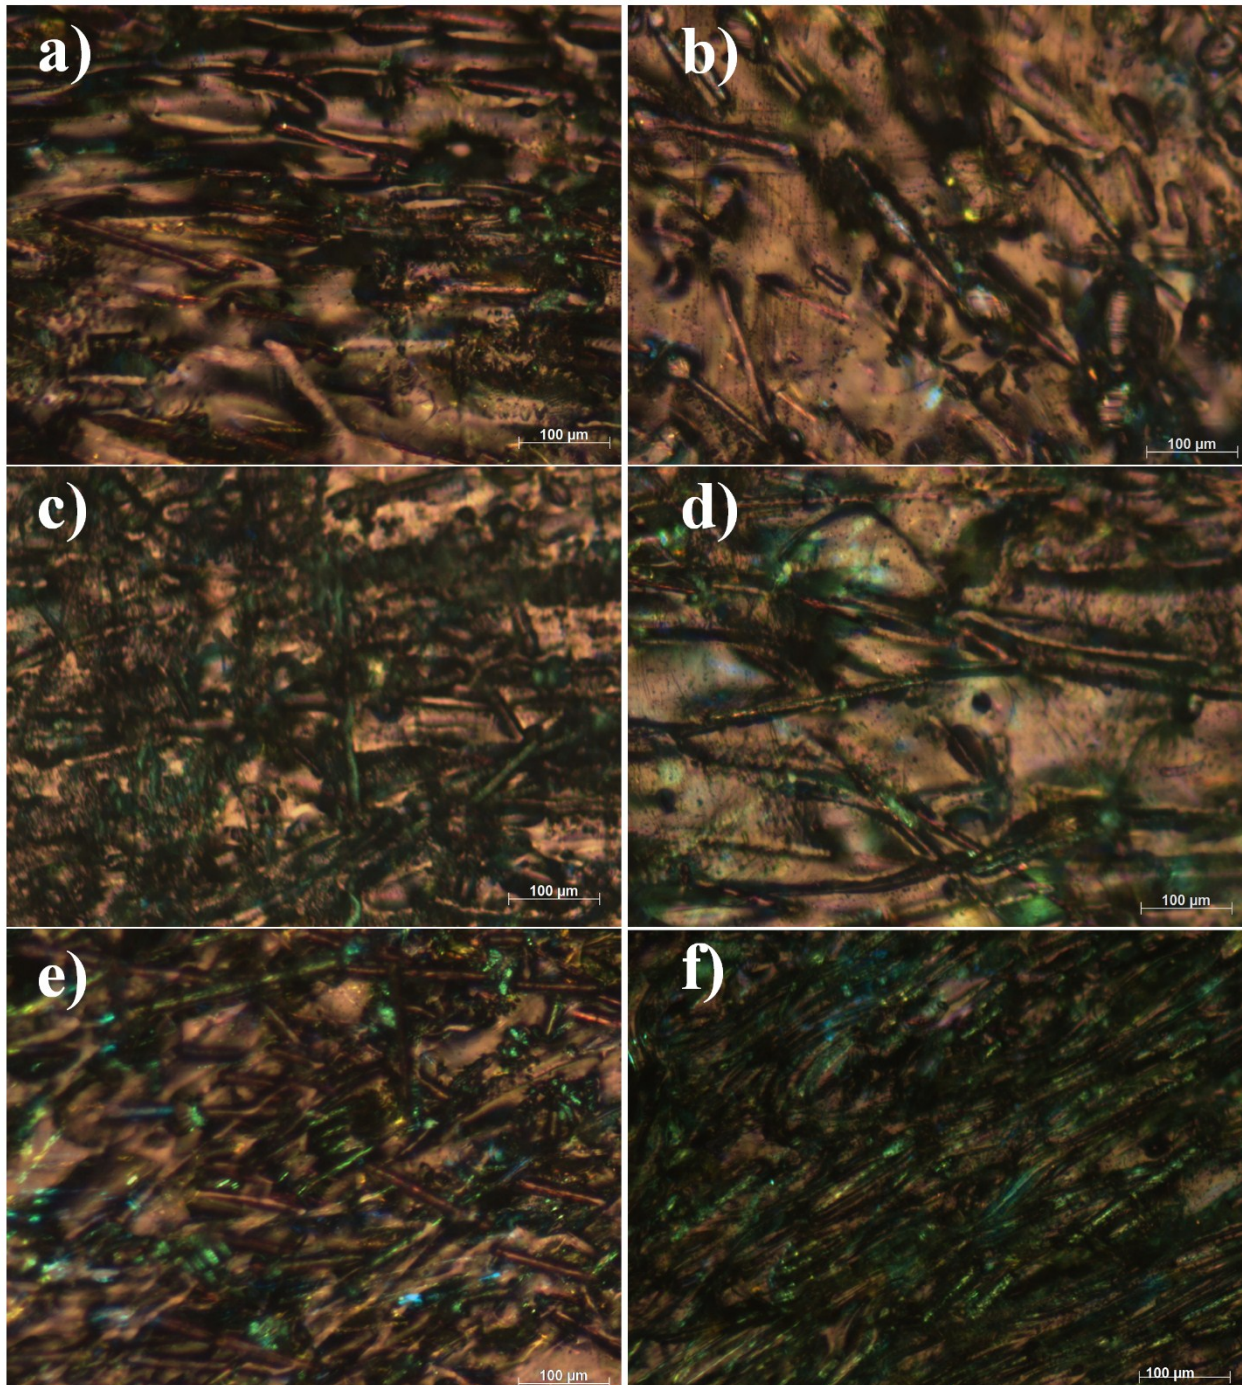

Supplement: c6ra08487g1.pdf [file c6ra08487g1.pdf]
